# Supplementary material
Source: Springer Nature journal article supplement (https://www.springermedizin.de/resource/supplementary/12877_2013_917_MOESM2_ESM.pdf/9440414)

### Clinical History

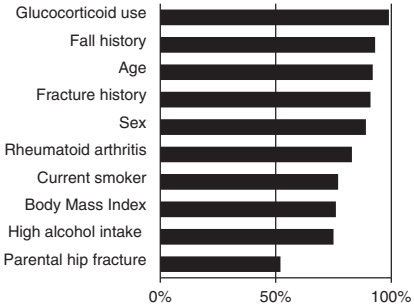

### Biochemical Evaluation

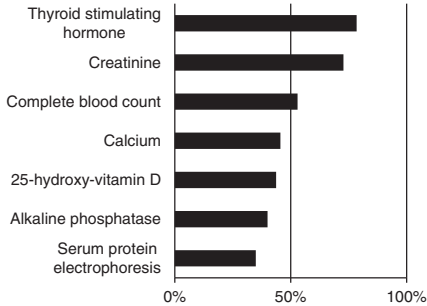

### Physical Exam

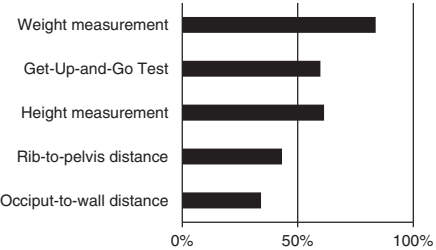

### Assessment Tools

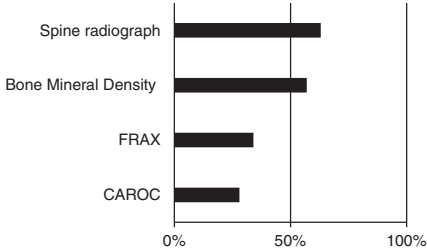

Supplement: MOESM2 [file 9440414]
